# Supplementary material for: Motor system recruitment during action observation: No correlation between mu-rhythm desynchronization and corticospinal excitability
Source: PubMed Central journal article supplement (PMC6237396; doi:10.1371/journal.pone.0207476), 2018-11-15

Supplementary Material

1. Fig A

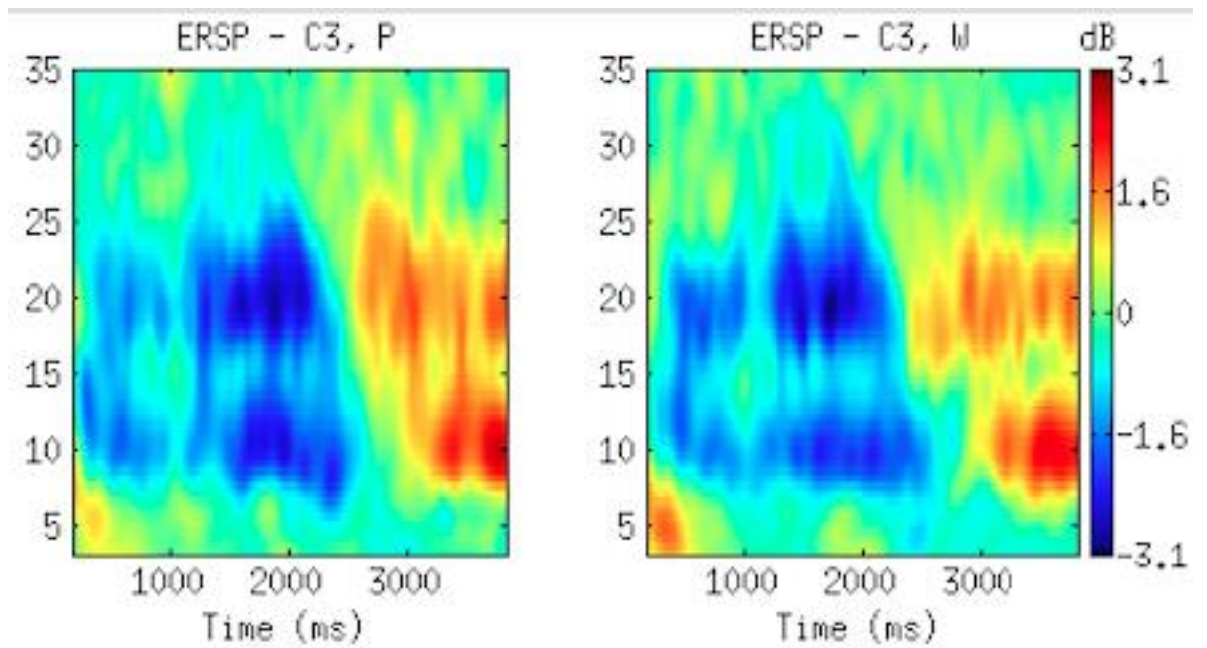

2. Fig B

B1

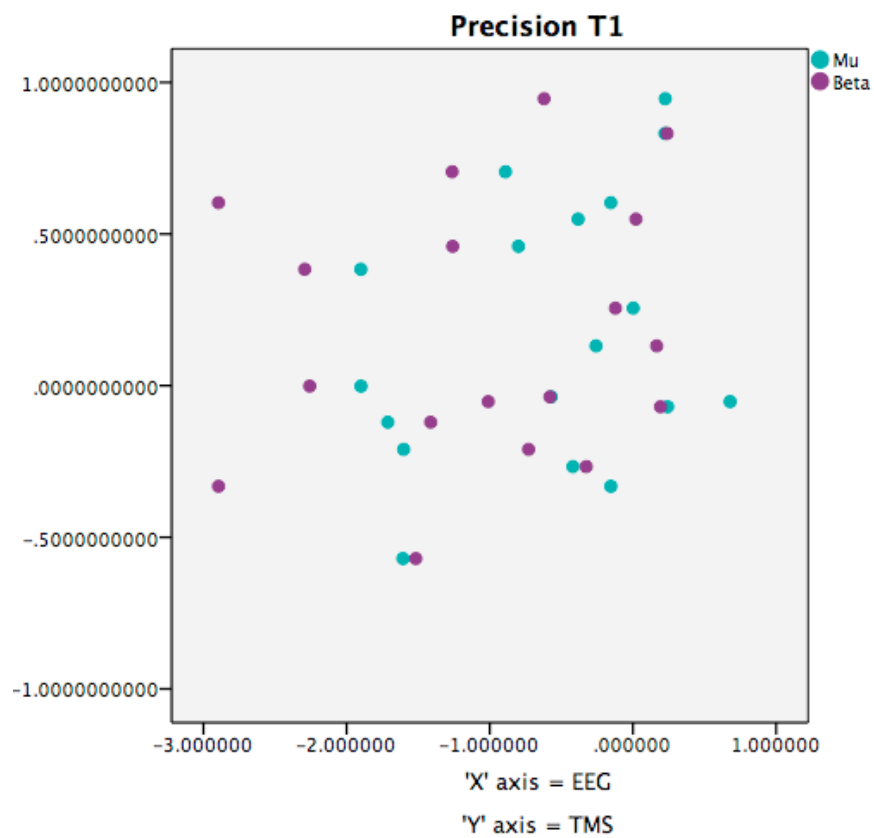

B2

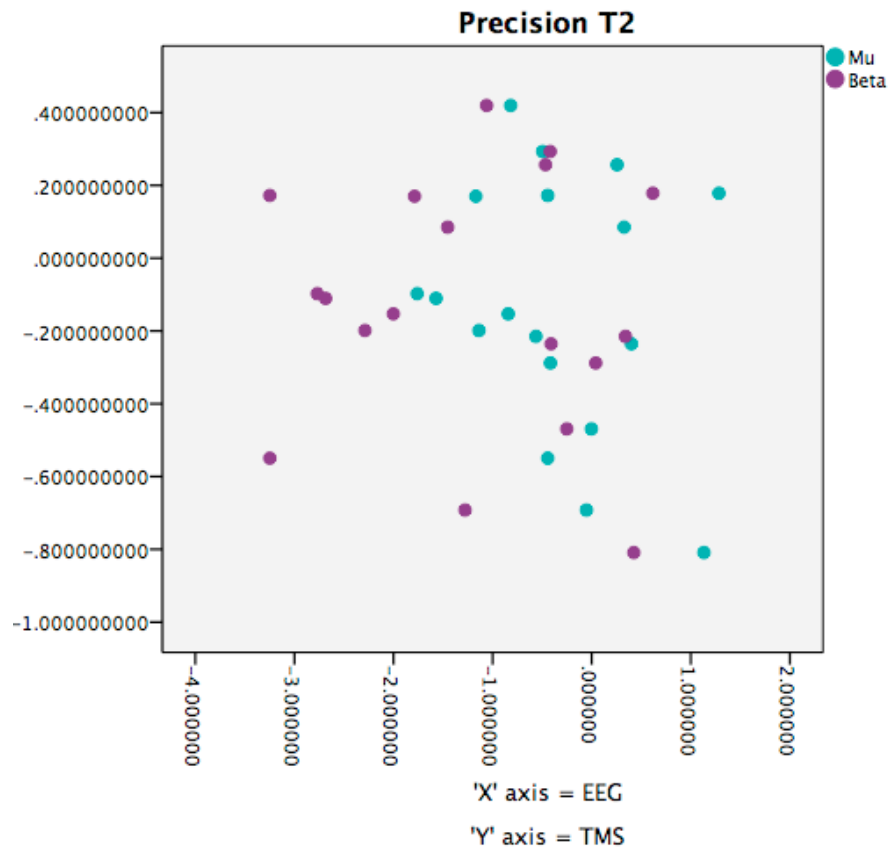

B3

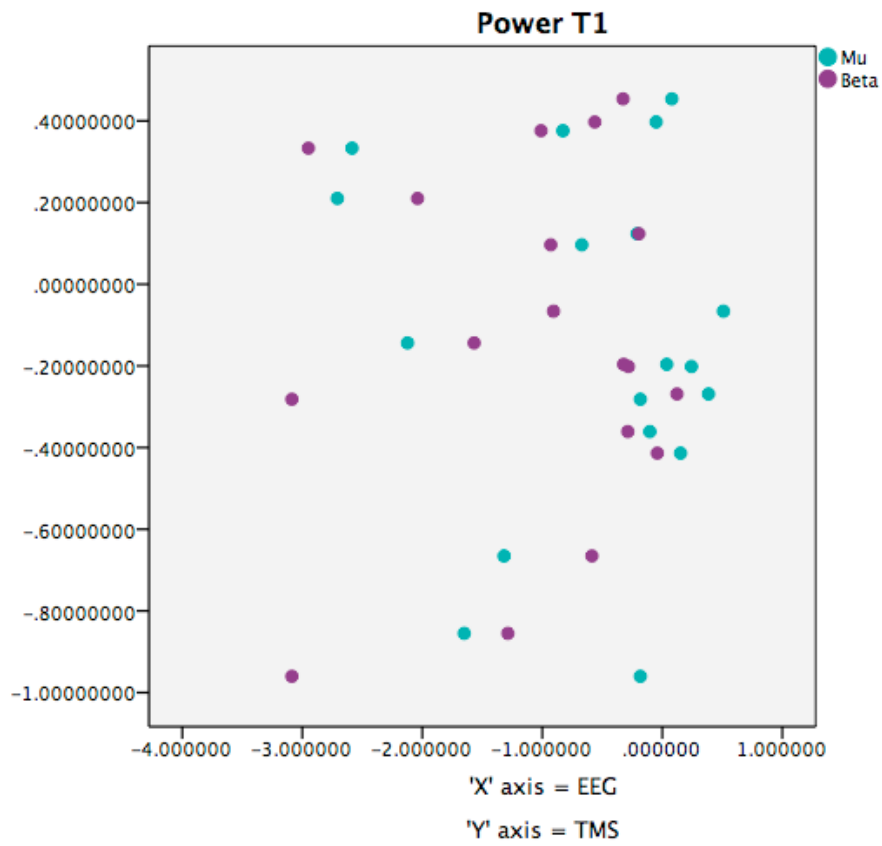

B4

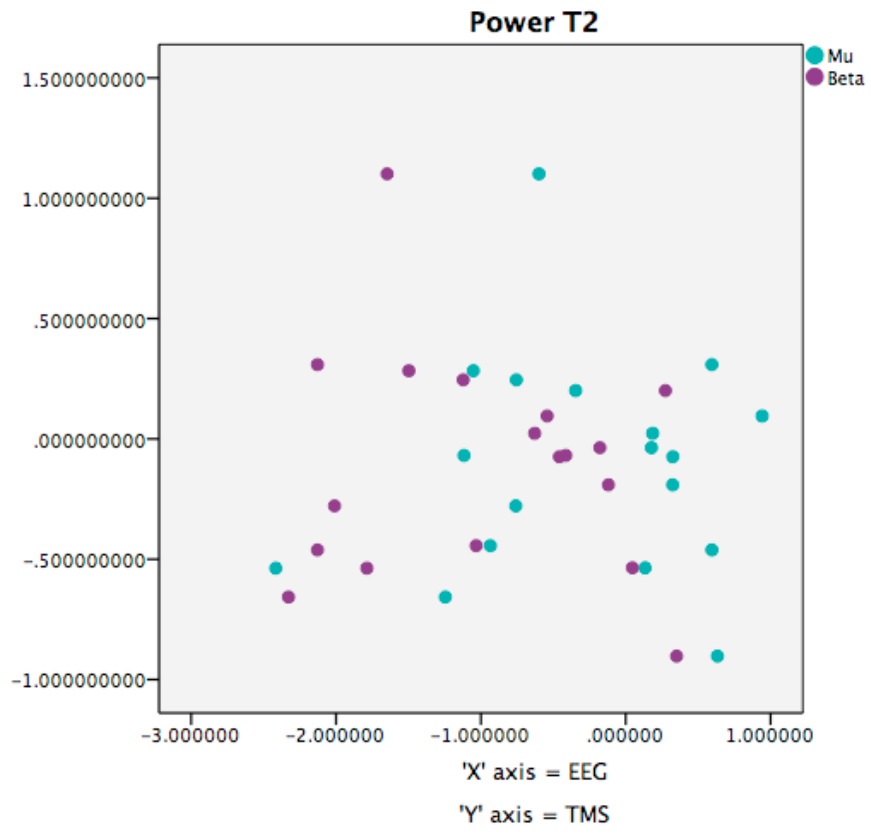

Supplement: pone.0207476.s001.pdf [file pone.0207476.s001.pdf]
